# Supplementary material
Source: PubMed Central journal article supplement (PMC5036627)

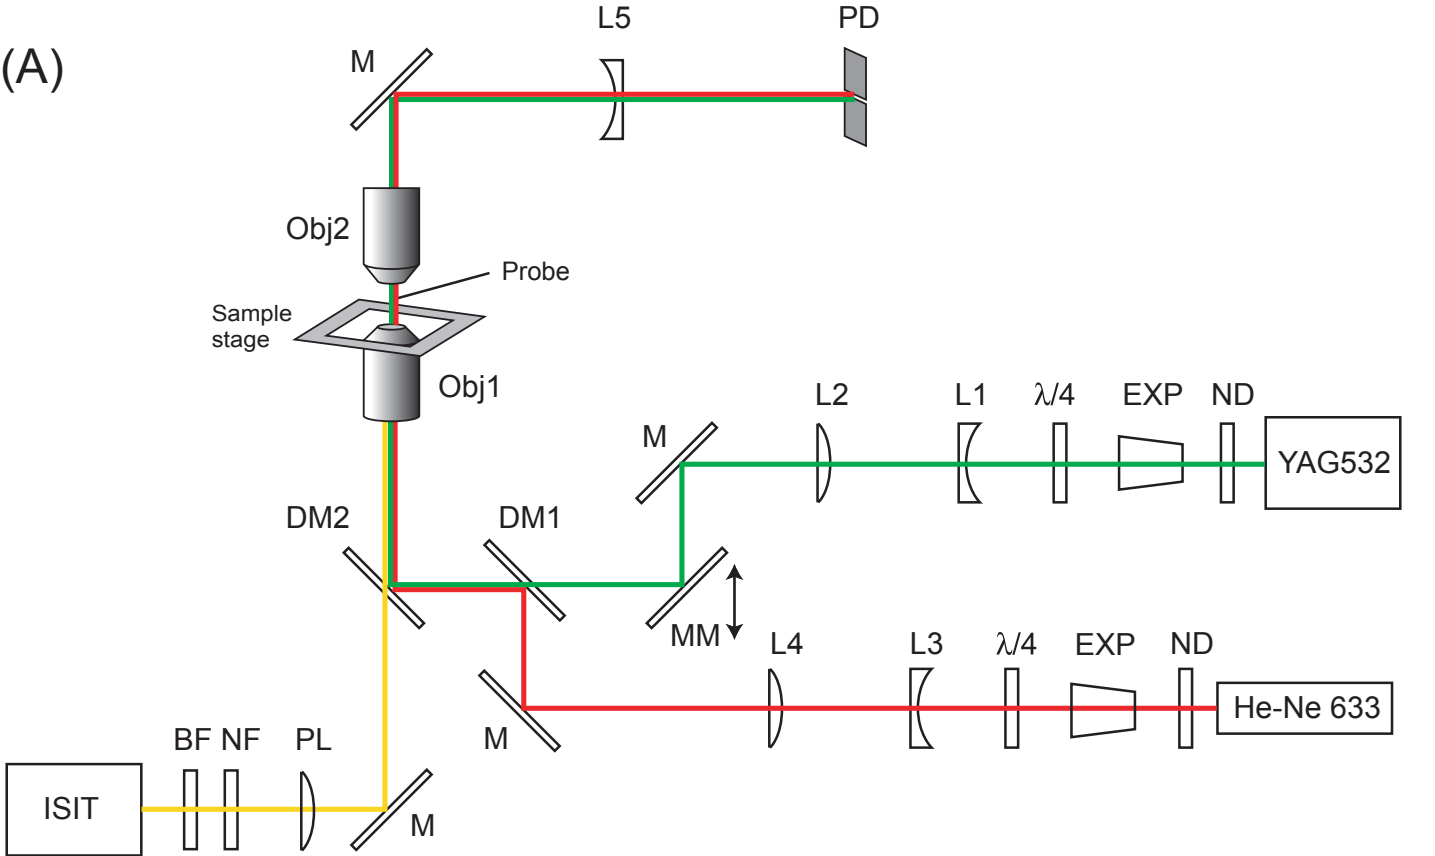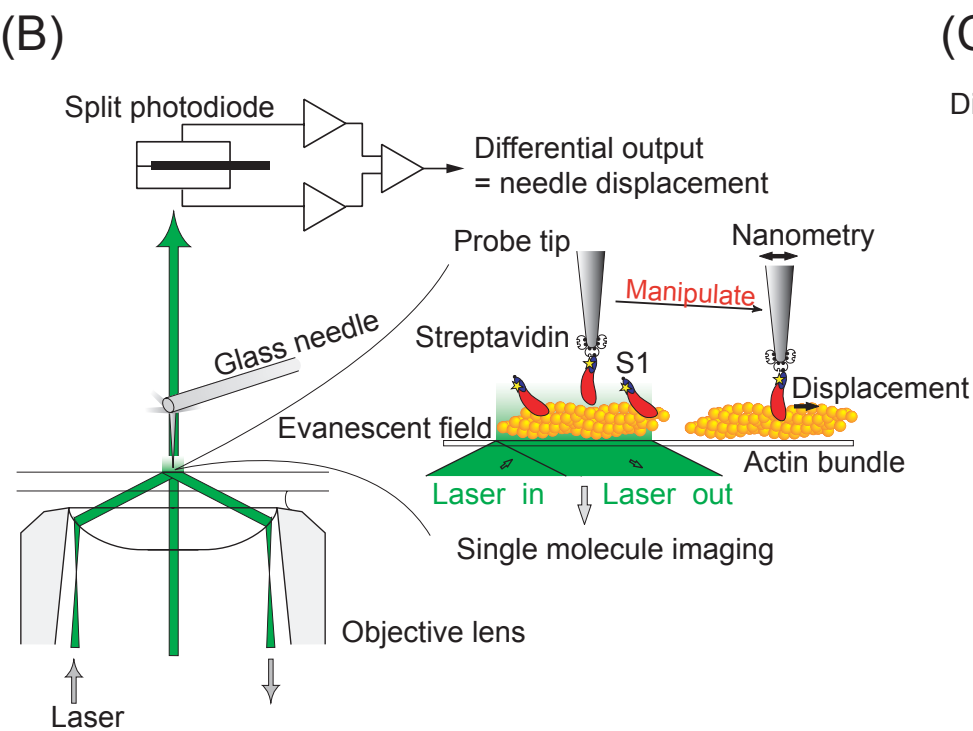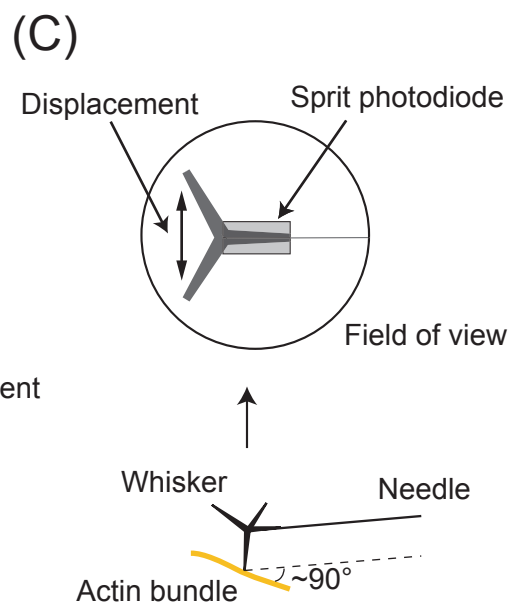

Supplement: 1_1_1.pdf [file 1_1_1.pdf]

(A)

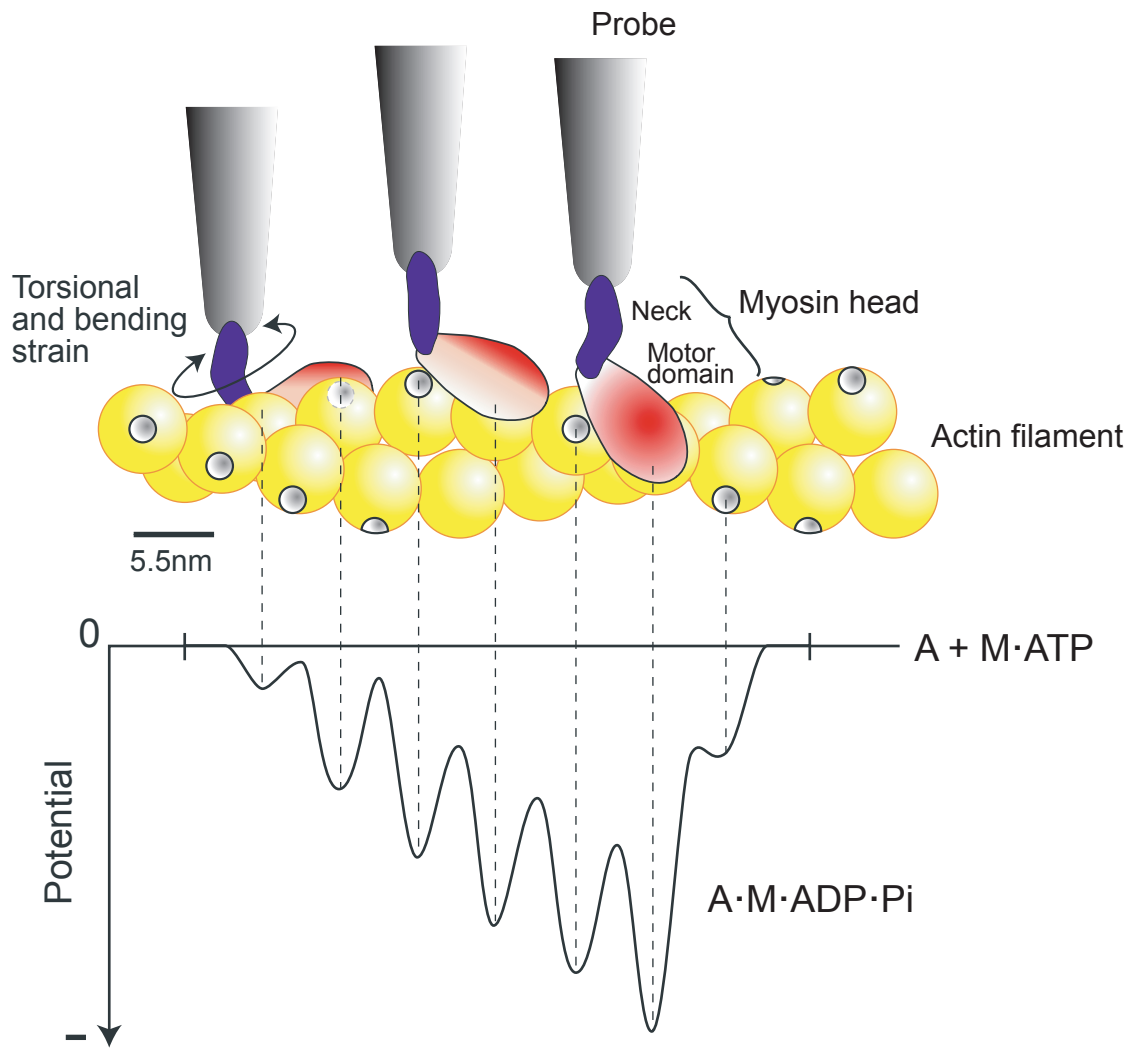

(B)

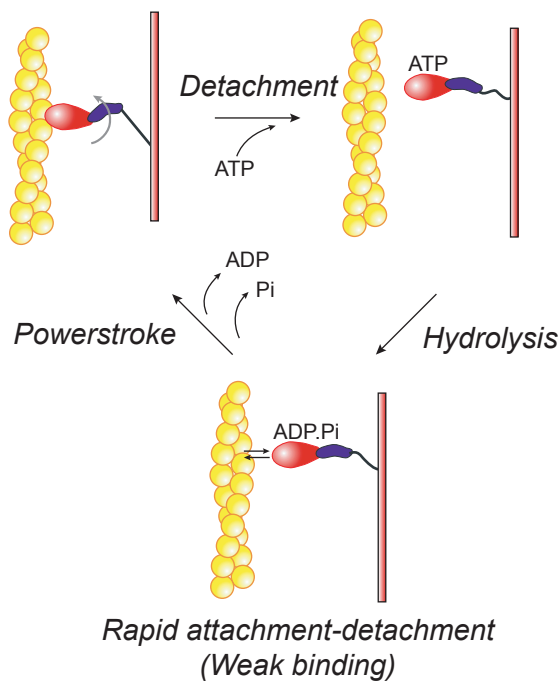

(C)

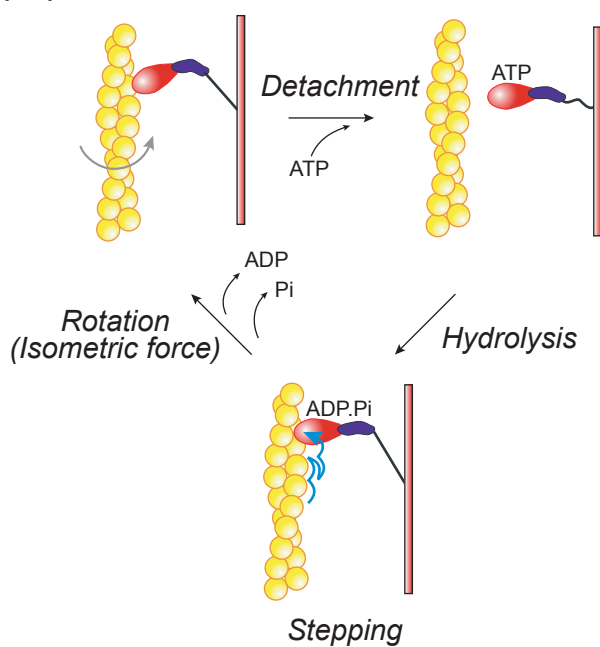

Supplement: 1_1_4.pdf [file 1_1_4.pdf]

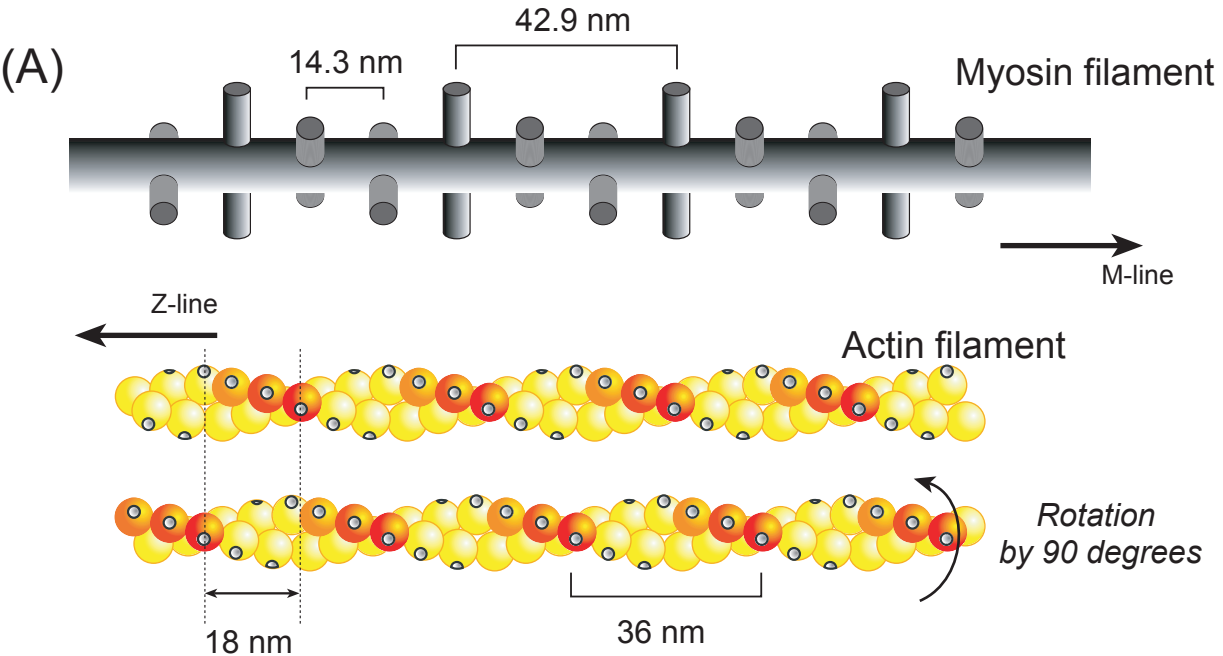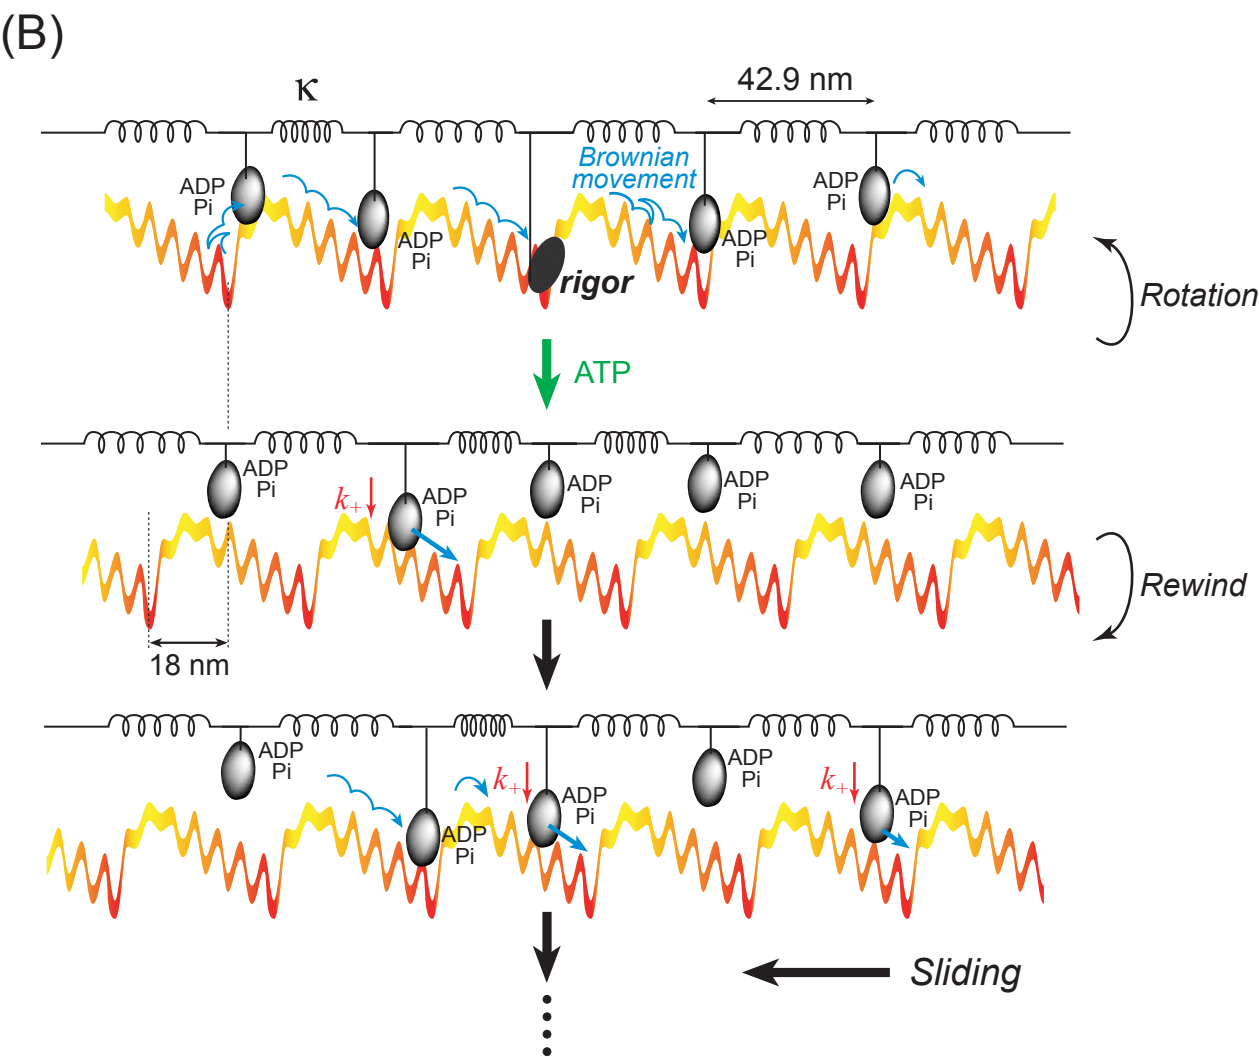

Supplement: 1_1_5.pdf [file 1_1_5.pdf]
